# Supplementary material
Source: PubMed Central journal article supplement (PMC4825769)

# SUPPLEMENTARY FIGURE 1

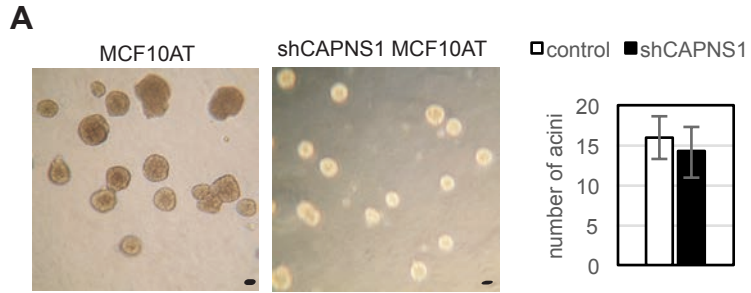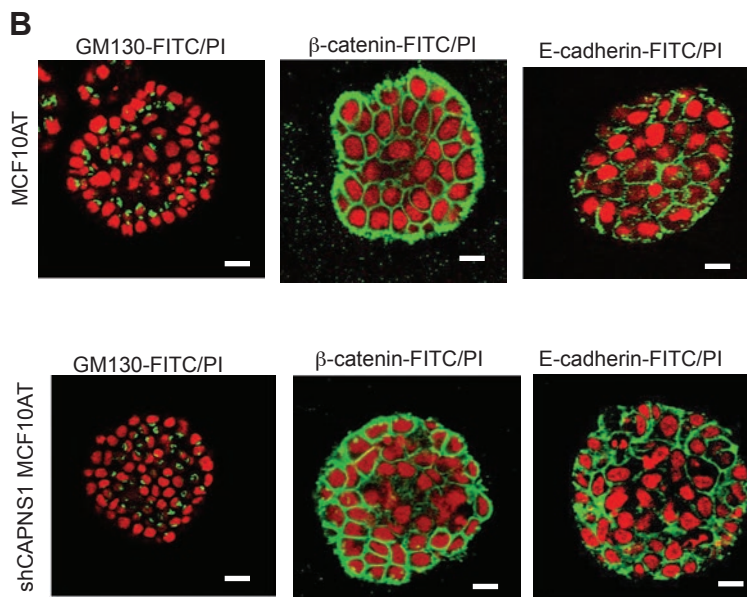

Supplement: kccy-15-01-1121325-s001.pdf [file kccy-15-01-1121325-s001.pdf]
